# Supplementary material for: The middle-to-late Eocene greenhouse climate, modelled using the CESM 1.0.5
Source: Copernicus journal article supplement (doi:10.5194/cp-2020-29), 2020-03-09
Supplement: Supplementary file 1 [file cp-2020-29-supplement.pdf]

Supplementary figures and tables

S1: Time series and patterns of ideal age tracers.

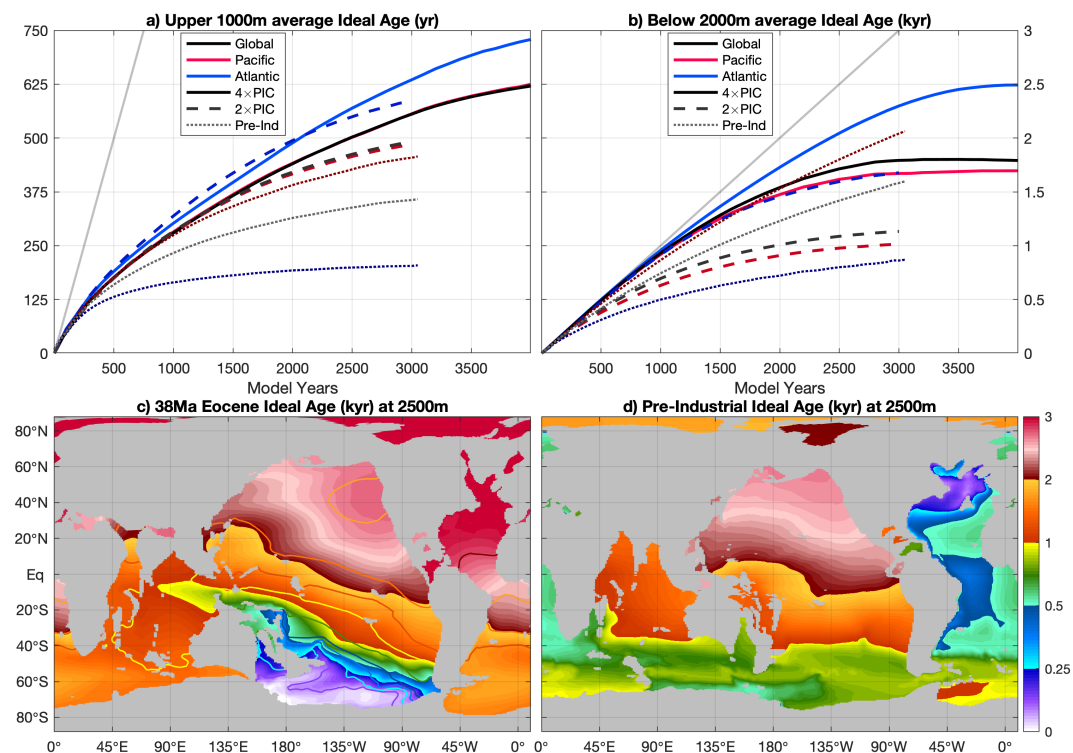

**Figure S1.** Time series of **a)** upper 1km and **b)** below 2km volume-weighted average ideal age tracers for Pre-Industrial (dotted), 38Ma 2× PIC (dashed) and 4× PIC (solid) spin-up simulations. Averages are shown globally (black) and for both the Pacific (red) and Atlantic (blue) ocean basins separately. **c)** 38Ma and **d)** pre-industrial horizontal distributions of ideal age tracers at 2500m depth for the end of each model simulation. Colour shading in **c)** shows the ideal age of 4× PIC, while contours do so for the 2× PIC case (using the same colourmap shown to the right).

**S2: Time series of Southern Ocean gateways and meridional overturning strength.**

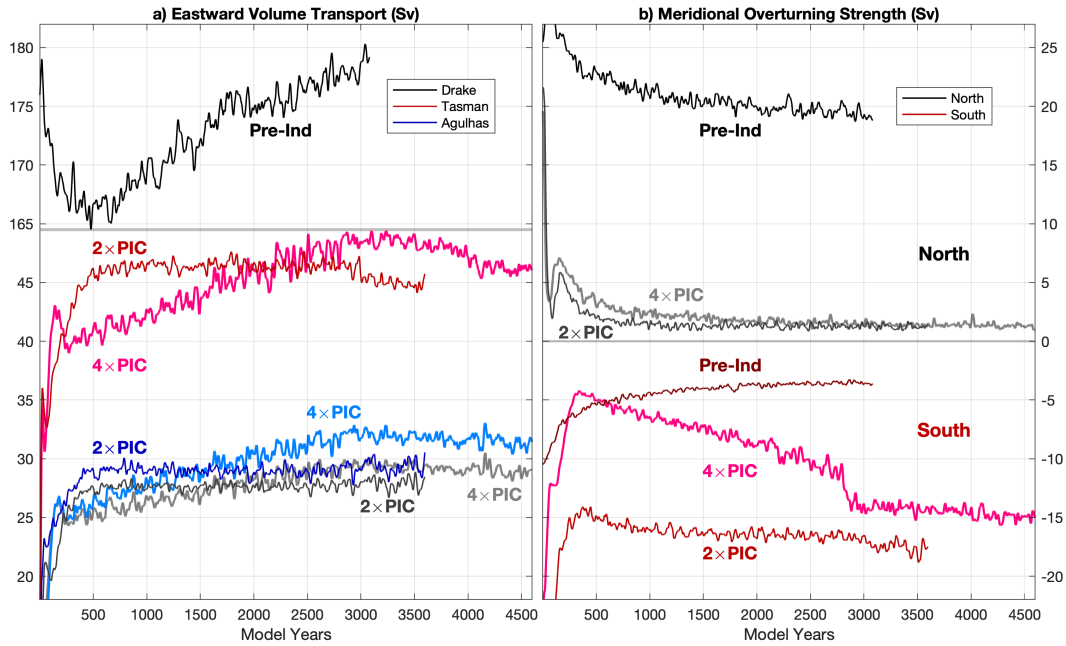

**Figure S2.** Time series of **a)** Southern Ocean Gateway volume transports and **b)** maximum global meridional overturning for both  $2\times$  PIC (dashed),  $4\times$  PIC (solid) Eocene and pre-industrial (dotted) spin-up simulations. Transports through three (one for pre-industrial) north-south transects in the Southern Ocean are considered: Drake Passage (black,  $65^\circ$ W), Tasmanian Gateway (red,  $150^\circ$ E) and Agulhas (blue,  $25^\circ$ E), with positive values indicating eastward flow.

### S3: Annual mean oceanic fields of the pre-industrial reference.

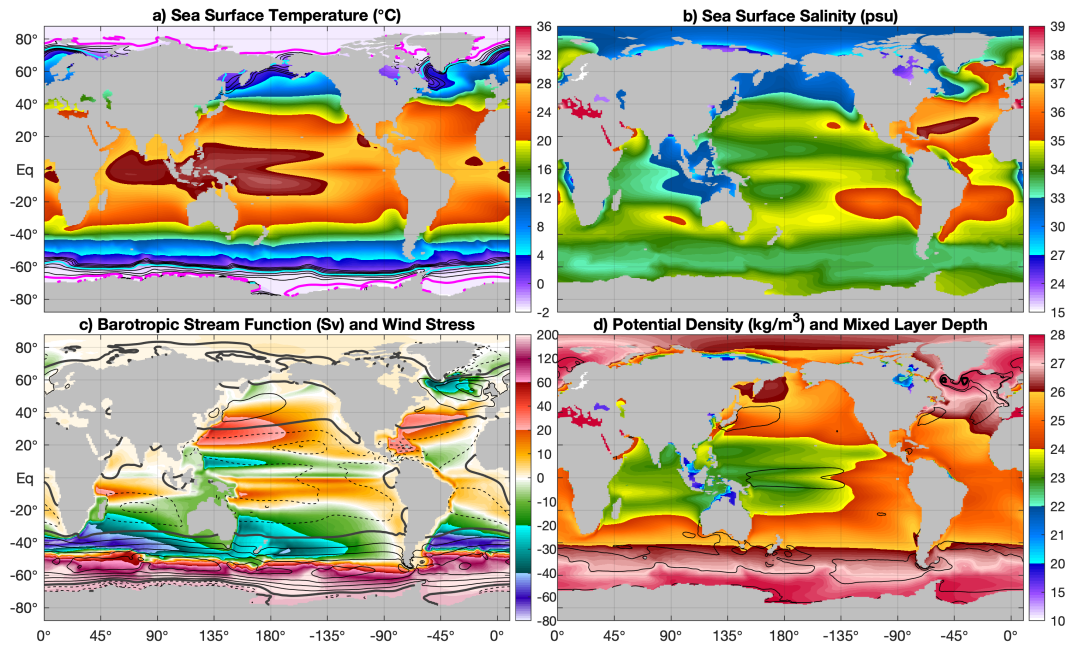

**Figure S3.** Annual mean for the pre-industrial reference simulation with sea surface **a)** temperature and **b)** salinity, **c)** barotropic stream function (shading, positive for clockwise flow) and zonal wind stress (contours every  $5 \cdot 10^{-2}$  Pa, solid positive and dashed negative, thick line at 0 Pa), and **d)** upper 200m average potential density (shading) and mixed layer depth (contour lines at 100m and 200m, thick line at 500m). Note the different colour scales in a), c) compared to Figures 3 and S4). Contours in a) show annual mean sea ice fraction at 10% intervals, thick cyan line at 50% and magenta at 90%.

**S4: Annual mean oceanic fields of the 38Ma 2× PIC case.**

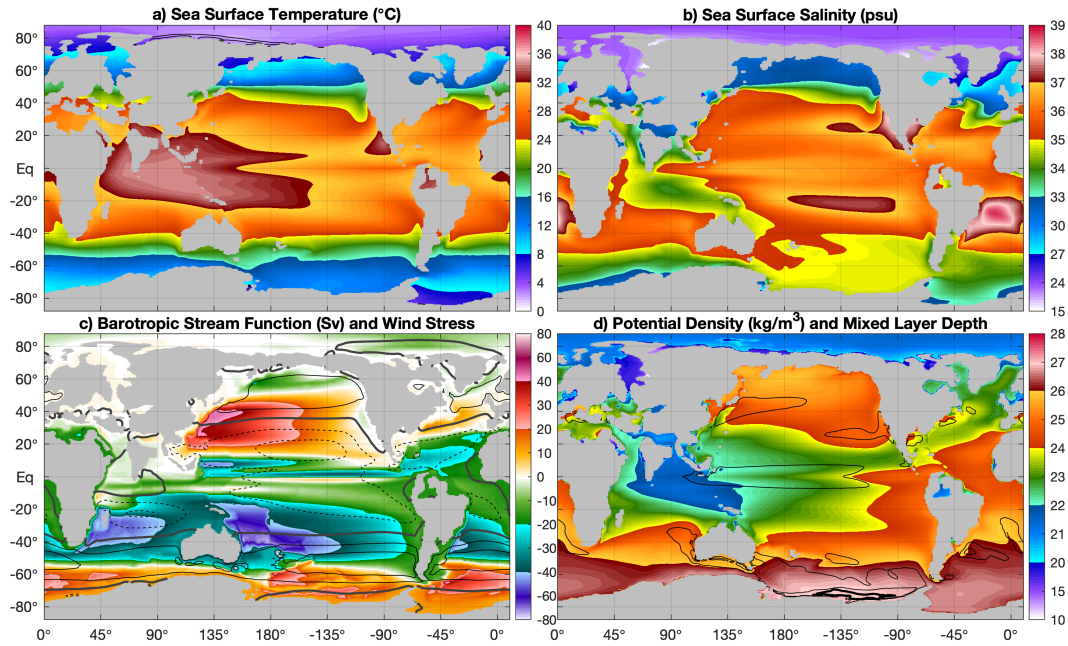

**Figure S4.** Annual mean for the 38Ma 2× PIC simulation with **a)** temperature and **b)** salinity, **c)** barotropic stream function (shading, positive for clockwise flow) and zonal wind stress (contours every  $5 \cdot 10^{-2}$  Pa, solid positive and dashed negative, thick line at 0 Pa), and **d)** upper 200m average potential density (shading) and mixed layer depth (contour lines at 100m and 200m, thick line at 500m). Contours in a) show annual mean sea ice fraction at 10% intervals.

1150

**S5: Annual mean atmospheric fields of the pre-industrial reference.**

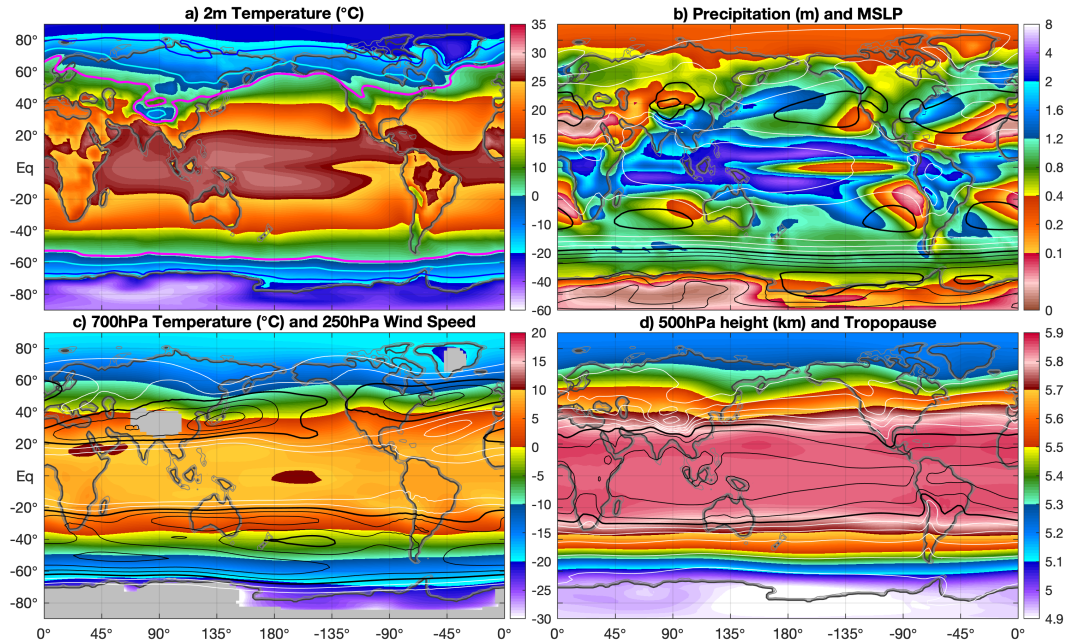

**Figure S5.** Annual mean for the pre-industrial reference simulation with **a)** near surface (2m) air temperature (shading) and average min/max temperature (contours; magenta:  $T_{min} < 0^{\circ}\text{C}$ , cyan:  $T_{min} < -10^{\circ}\text{C}$ , blue:  $T_{min} < -20^{\circ}\text{C}$ ), **b)** precipitation (shading) and mean sea level pressure (contours every 5hPa, thick black lines every 20hPa,  $\leq 1000\text{hPa}$  in black and  $> 1000\text{hPa}$  in white), **c)** 700hPa temperature (shading) and 200hPa wind speed (contours every 5m/s starting at 10m/s; white for  $< 20\text{m/s}$  and black for  $> 20\text{m/s}$ , thick black lines every 20m/s), and **d)** 500hPa geopotential height (shading) and tropopause height (contours every 1km starting at 12km; white for  $< 15\text{km}$  and black for  $> 15\text{km}$ , thick black line at 15km). Note the different colour scales in a), c), d) compared to Figures 4 and S6).

**S6: Annual mean atmospheric fields of the 38Ma  $2\times$  PIC case.**

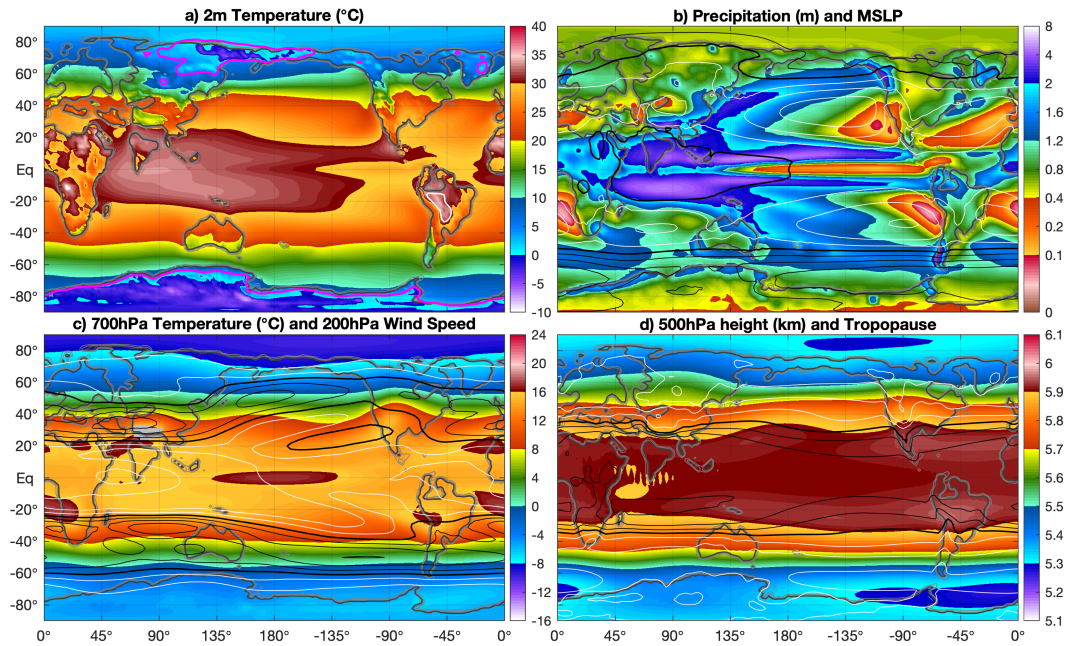

**Figure S6.** Annual mean for the 38Ma  $2\times$  PIC simulation with **a)** 2m above ground level air temperature (shading) and average min/max temperature (contours; magenta:  $T_{min} < 0^\circ\text{C}$  and white:  $T_{max} > 40^\circ\text{C}$ ), **b)** precipitation (shading) and mean sea level pressure (contours every 5hPa, thick black lines every 20hPa,  $\leq 1000\text{hPa}$  in black and  $> 1000\text{hPa}$  in white), **c)** 700hPa temperature (shading) and 200hPa wind speed (contours every 5m/s starting at 10m/s; white for  $< 20\text{m/s}$  and black for  $> 20\text{m/s}$ , thick black lines every 20m/s), and **d)** 500hPa geopotential height (shading) and tropopause height (contours every 1km starting at 12km; white for  $< 15\text{km}$  and black for  $> 15\text{km}$ , thick black line at 15km).

**S7: Seasonally averaged oceanic fields of the 38Ma 4× PIC case.**

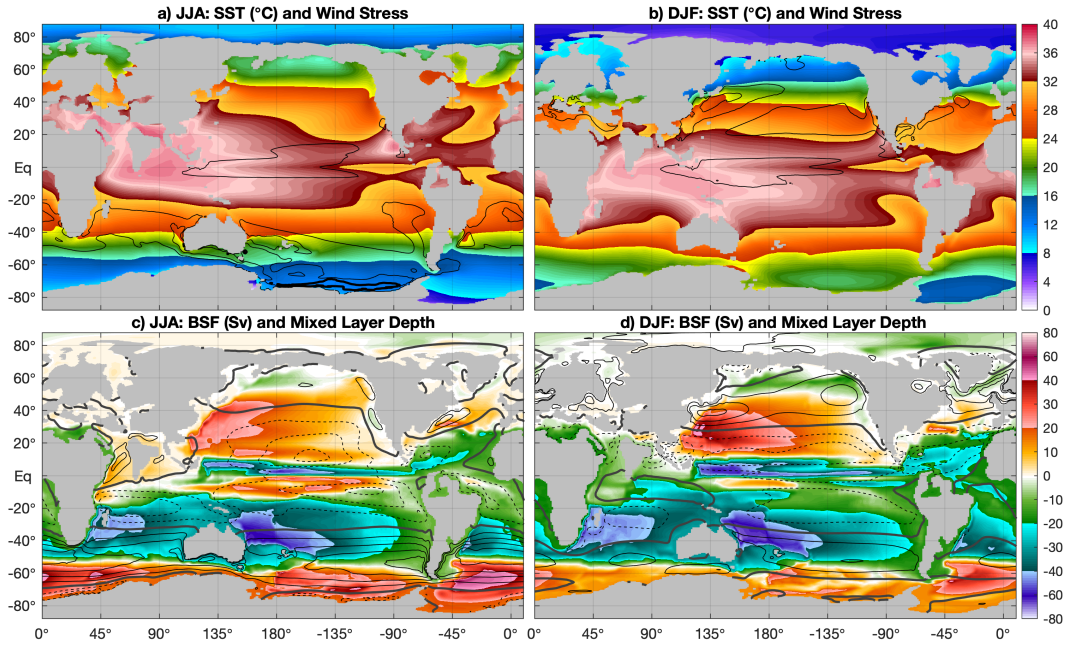

**Figure S7.** 38Ma 4× PIC **a)** June-July-August and **b)** December-January-February averaged sea surface temperature (shading) and mixed layer depth (contour lines at 100m and 200m, thick line at 500m). **c)** and **d)** Similar to a) and b), but for the barotropic stream function and zonal wind stress (contours every  $5 \cdot 10^{-2}$  Pa; solid positive and dashed negative, thick line at 0 Pa). Coloured contours in a) and b) show sea ice fraction at 50% (cyan) and 90% (magenta) in August and February, respectively.

**S8: Seasonally averaged atmospheric fields of the 38Ma 4 × PIC case.**

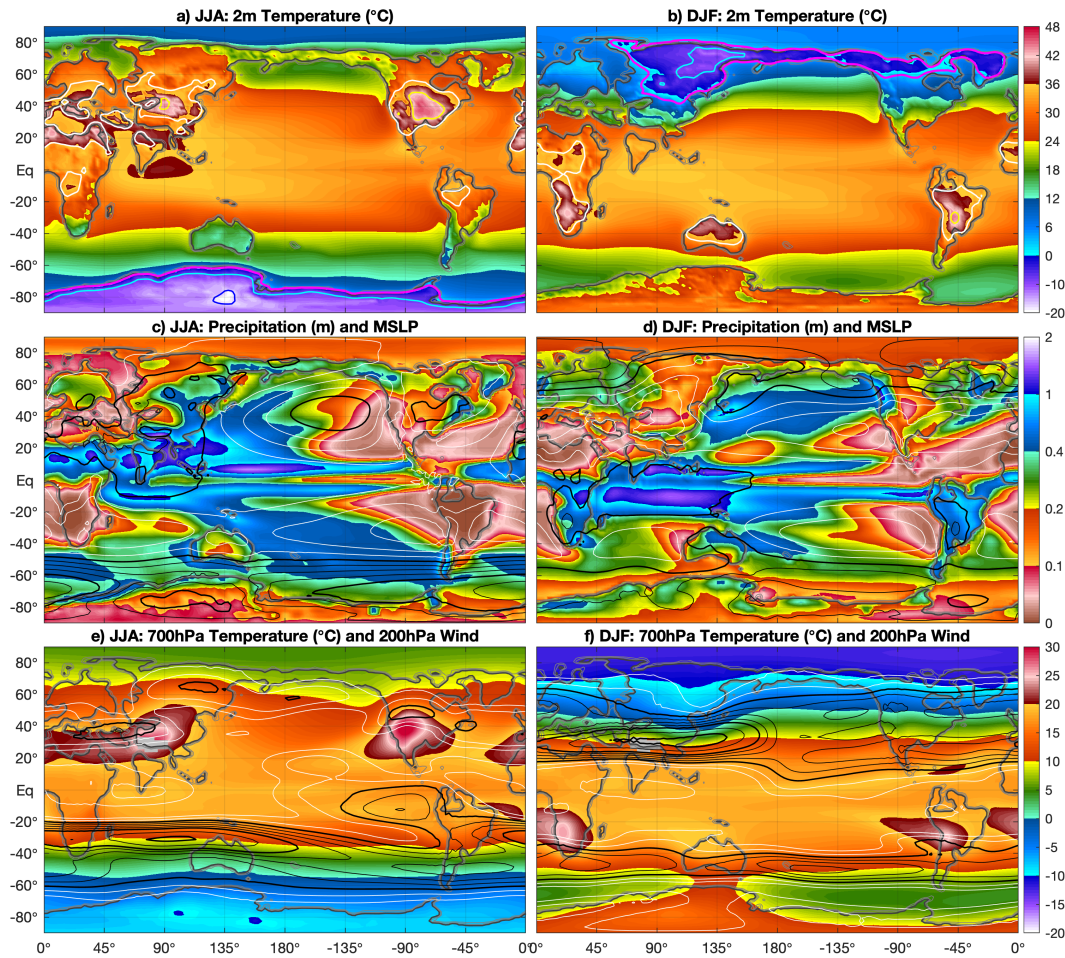

**Figure S8.** 38Ma 4 × PIC **a)** June-July-August and **b)** December-January-February mean 2m air temperature (shading) and average min/max temperature (contours; magenta:  $T_{min} < 0^{\circ}\text{C}$ , cyan:  $T_{min} < -10^{\circ}\text{C}$ , blue:  $T_{min} < -20^{\circ}\text{C}$ , white:  $T_{max} > 40^{\circ}\text{C}$  and yellow:  $T_{max} > 50^{\circ}\text{C}$ ), **c)** and **d)** similar to a) and b) for total precipitation (shading) and mean sea level pressure (contours every 5hPa, thick black lines every 20hPa,  $\leq 1000\text{hPa}$  in black and  $> 1000\text{hPa}$  in white), and **e)** and **f)** for 700hPa temperature (shading) and 200hPa wind speed (contours every 5m/s starting at 10m/s; white for  $< 20\text{m/s}$  and black for  $> 20\text{m/s}$ , thick black lines every 20m/s).



**S9: Zonal mean SST of the 38Ma 2× PIC case and 38–34 Ma proxies.**

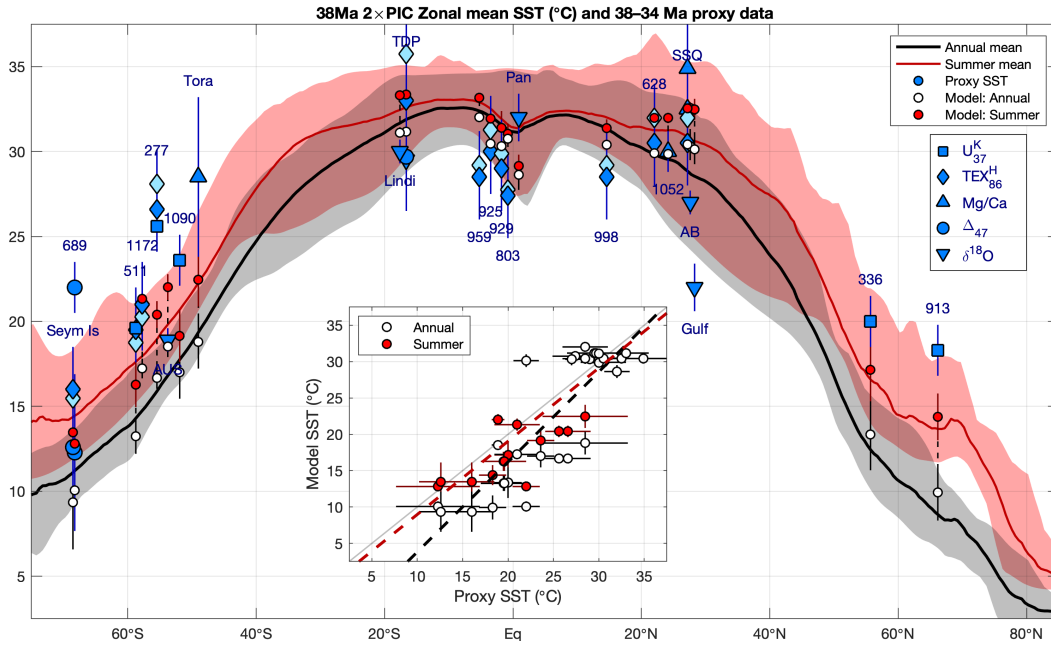

**Figure S9.** Zonally averaged annual mean (black) and summer mean (red) SST, shaded regions showing zonal spread for the 38Ma 2× PIC case. Blue markers indicate SST proxy estimates, whereas white (annual) and red (summer) circles depict model values at the corresponding 38Ma locations. Error bars represent proxy calibration errors and the model spatial variation within a  $4^\circ \times 4^\circ$  box. The inset shows a scatter plot of model versus proxy SST, with a linear fit using annual mean (black) or summer mean (red; only outside of the tropics) model values.

1155

**S10: Zonal mean near surface air temperature of the 38Ma 4× PIC case and 42–38 Ma proxies.**

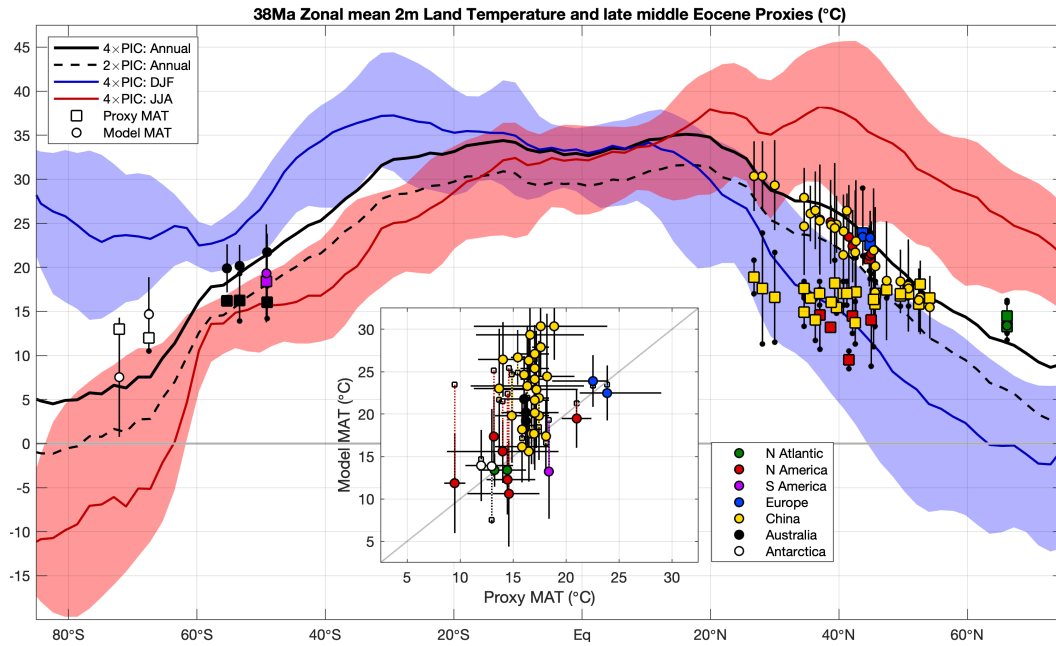

**Figure S10.** Zonally averaged annual mean (black), December–February (blue) and June–August (red) near surface air temperature (land-only) for the 38Ma 2× PIC case (solid line; dashed: 4× PIC). Red and blue shading indicates zonal variability of the according seasonal averages. Markers show late middle Eocene proxy estimates (squares) and corresponding model annual mean (circles), colour coded for their respective region. Error bars (black dots) are indicative of the spread at each site (proxies) or spatial variation in a 5°×4° box (model). The inset shows a scatter plot of model versus proxy air temperatures, the former being corrected for differences in model and reconstructed topography (uncorrected: small squares).

**S11: Zonal mean near surface air temperature of the 38Ma 2× PIC case and 38–34 Ma proxies.**

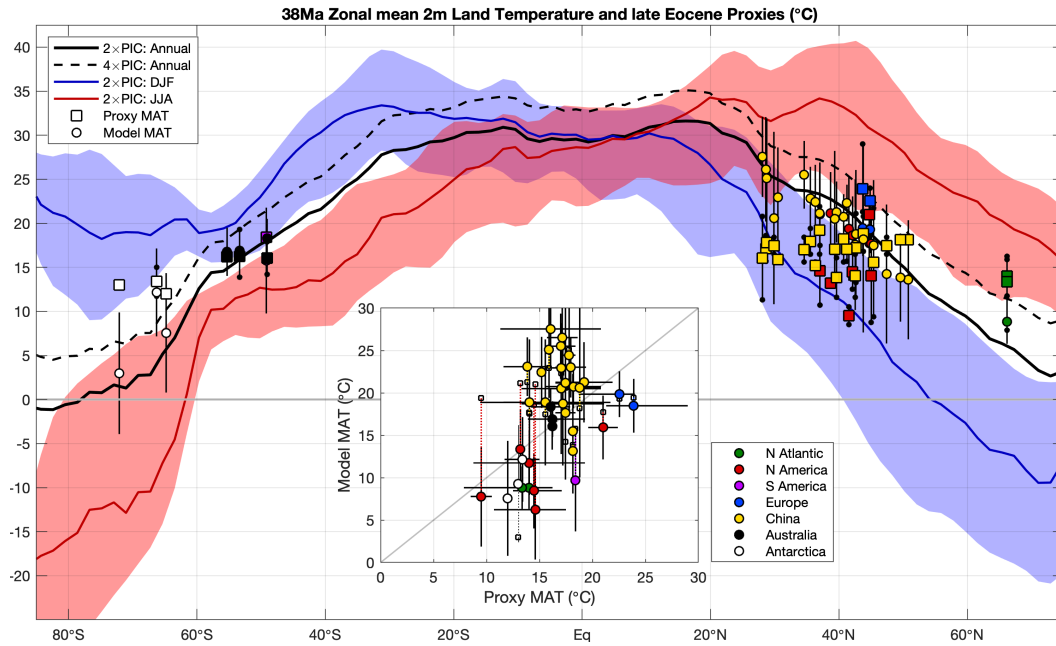

**Figure S11.** Zonally averaged annual mean (black), December–February (blue) and June–August (red) near surface air temperature (land-only) for the 38Ma 2× PIC case (solid line; dashed: 4× PIC). Red and blue shading indicates zonal variability of the according seasonal averages. Markers show late Eocene proxy estimates (squares) and corresponding model annual mean (circles), colour coded for their respective region. Error bars (black dots) are indicative of the spread at each site (proxies) or spatial variation in a  $5^{\circ} \times 4^{\circ}$  box (model). The inset shows a scatter plot of model versus proxy air temperatures, the former being corrected for differences in model and reconstructed topography (uncorrected: small squares).

**S12: Comparison of oceanic fields from the 38Ma 4× PIC case and 45Ma 4× CO<sub>2</sub> (GH14).**

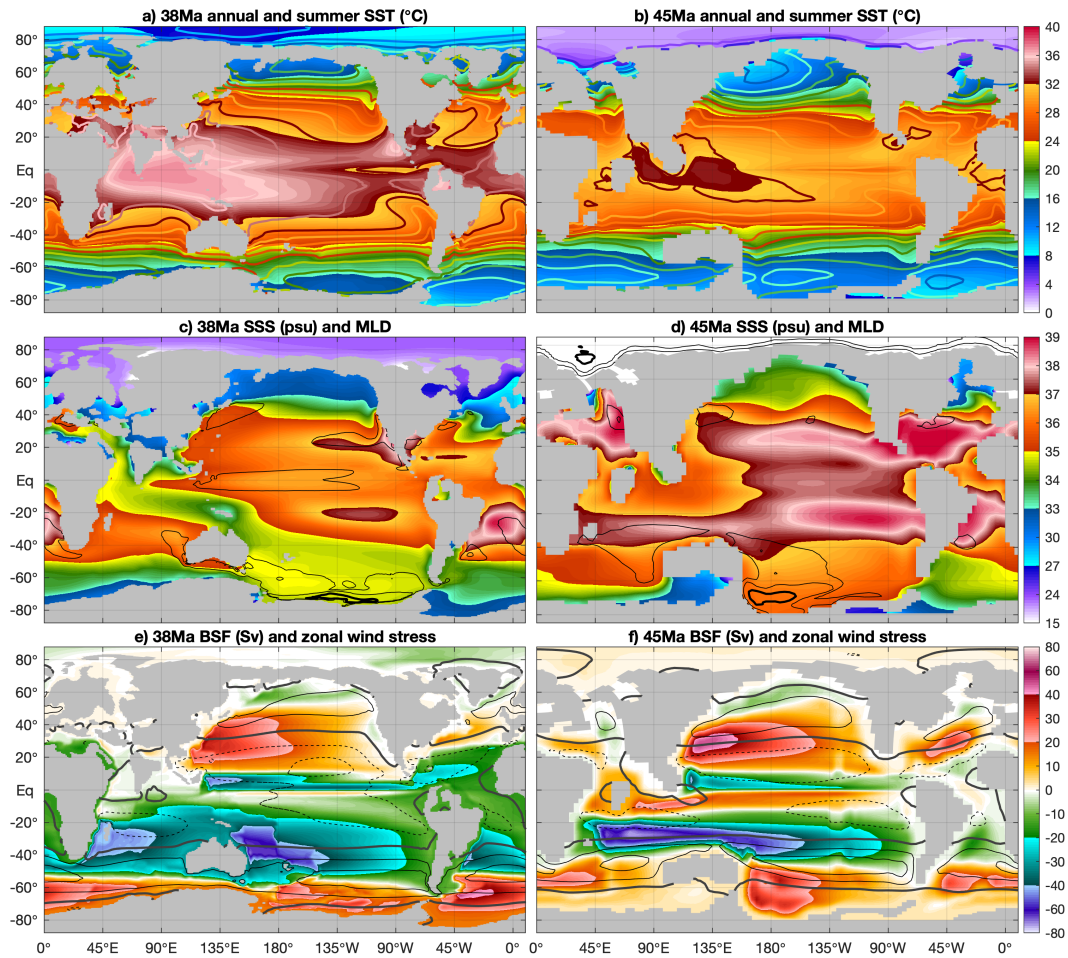

**Figure S12.** Annual mean (shading) and summer (contours every 2°C) sea surface temperatures for the **a)** 38Ma 4× PIC simulation (this study) and **b)** from Goldner et al. (2014) (GH14) using a 45Ma geography and 4× pre-industrial CO<sub>2</sub>. A similar comparison is made in **c)** and **d)** for sea surface salinity (shading) and mixed layer depth (contour lines at 100m and 200m, thick line at 500m), as well as in **e)** and **f)** for barotropic stream function (shading) and zonal wind stress (contours every 5·10<sup>-2</sup>Pa; solid positive and dashed negative, thick line at 0Pa). All colour scales and contour intervals meet the same conventions as those used in Figures 3 and S4.

**S13: Comparison of atmospheric fields from the 38Ma  $4\times$  PIC case and 45Ma  $4\times$  CO<sub>2</sub> (GH14).**

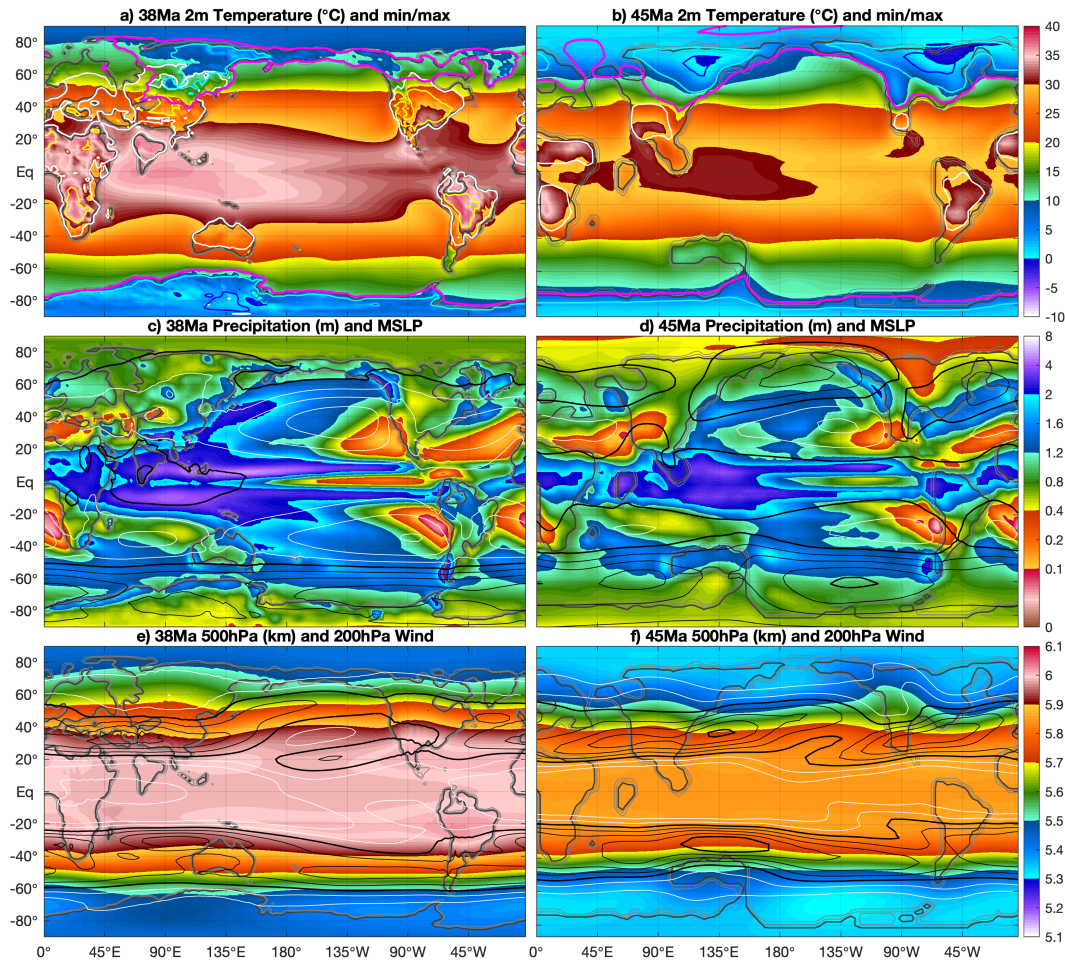

**Figure S13.** Annual mean (shading), warmest monthly maximum (white: 40°C and yellow: 50°C) and coldest monthly minimum (magenta: 0°C, cyan: -10°C, blue: -20°C) near surface air temperature for the **a)** 38Ma  $4\times$  PIC simulation (this study) and **b)** from Goldner et al. (2014) (GH14) using a 45Ma geography and  $4\times$  pre-industrial CO<sub>2</sub>. A similar comparison is made in **c)** and **d)** for precipitation (shading) and mean sea level pressure (contours every 5hPa, thick black lines every 20hPa,  $\leq 1000$ hPa in black and  $>1000$ hPa in white), as well as in **e)** and **f)** for 500hPa geopotential height (shading) and 200hPa wind speed (contours every 5m/s starting at 10m/s; white for  $<20$ m/s and black for  $>20$ m/s, thick black lines every 20m/s). All colour scales and contour intervals meet the same conventions as those used in Figures 4 and S6.

### S14: Comparison of zonally averaged atmospheric warming patterns.

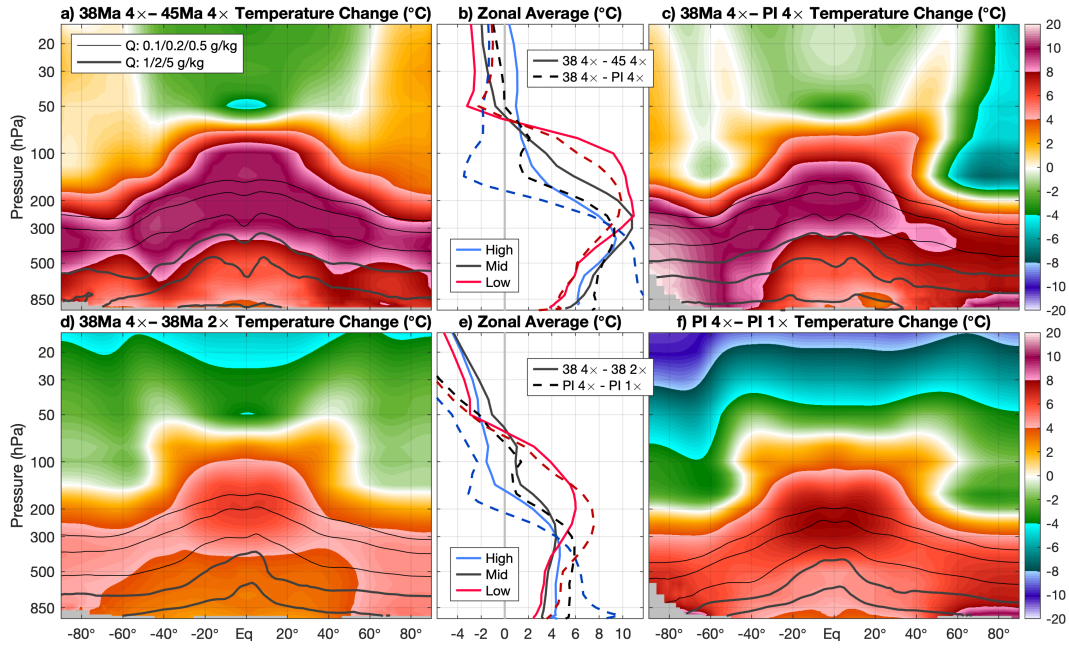

**Figure S14.** Zonally averaged temperature (shading) and humidity (contours) difference for **a)** 38Ma 4× PIC versus 45Ma 4× CO<sub>2</sub> (GH14), **c)** 38Ma 4× PIC versus the pre-industrial reference, **d)** 38Ma 4× PIC versus 38Ma 2× PIC, and **f)** pre-industrial 4× CO<sub>2</sub> versus the pre-industrial reference. Meridionally averaged temperature changes are shown in the **b)** and **e)** for low (0–30°; red), middle (30–60°; black) and high (60–90°; blue) latitudes, respectively (both hemispheres). Solid lines correspond to the pattern shown to the left, dashed lines to the one to the right.

### Comparison of globally averaged atmospheric fluxes.

| Case                                  | 38 4×–45 4× | 38 4×–38 2× | 38 4×–PI 4× | PI 4×–PI 1× |
|---------------------------------------|-------------|-------------|-------------|-------------|
| <b>Flux (W/m<sup>2</sup>)</b>         |             |             |             |             |
| <b>Shortwave<sub>surface</sub></b>    | -0.25       | +0.08       | +7.87       | +4.27       |
| <b>Shortwave<sub>top</sub></b>        | +14.73      | +1.66       | +10.07      | +4.32       |
| <b>Shortwave<sub>atmosphere</sub></b> | -5.40       | -3.02       | -4.62       | -4.38       |
| <b>Shortwave<sub>cloud</sub></b>      | +13.84      | +1.27       | +0.16       | -0.69       |
| <b>Longwave<sub>top</sub></b>         | -14.67      | -1.63       | -10.68      | -3.86       |
| <b>Longwave<sub>atmosphere</sub></b>  | +22.38      | +9.06       | +26.19      | +12.90      |
| <b>Longwave<sub>cloud</sub></b>       | -6.40       | -1.16       | +0.45       | -1.09       |

**Table S1.** Globally averaged flux differences for the four model-model comparison cases shown in Figure S14. All of the flux components are defined such that a positive number (red) means that the specific component has a warming effect, while negative values (blue) induce a cooling. Total fluxes are divided into their shortwave and longwave parts, which are then subdivided into more specific components. *Surface* and *top* denote the respective change in partial radiative balance, while *atmosphere* and *cloud* refer to the respective effect on that balance (i.e. the effect of the clear atmosphere and integrated cloud cover).

**S15: Model response to instant  $4\times$  CO<sub>2</sub> from the pre-industrial reference.**

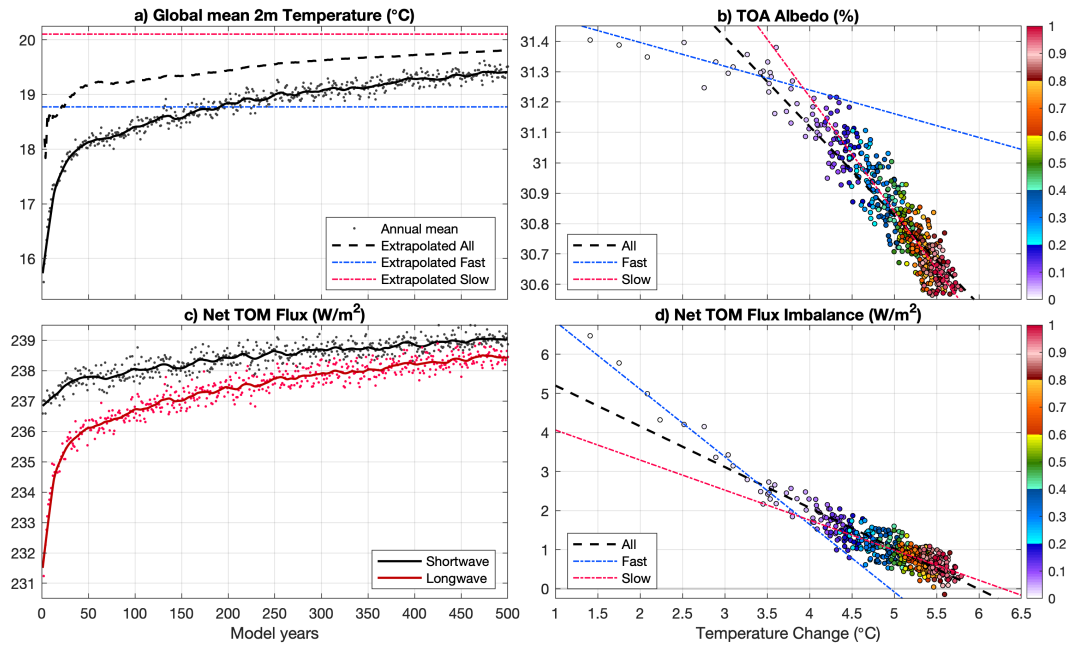

**Figure S15.** Modelled response after an instant quadrupling of atmospheric CO<sub>2</sub>, starting from the equilibrated state of the pre-industrial reference. **a)** Annual mean globally averaged near surface air temperature (dots; thick line: using a 25-year smoothing window) with the dashed black line showing the extrapolated response to that point (similarly in blue: extrapolation using years 1–20 and red: using years 101–500). **b)** Top of the atmosphere albedo: annual (markers; coloured to normalised model time) and linear interpolation (black: all, blue: years 1–20 and red: years 101–500). **c)** Top of model net shortwave (black) and longwave flux (red): yearly (dots) and smoothed (lines). **d)** Top of model flux imbalance (shortwave - longwave, see c) ) versus globally averaged temperature change (from the pre-industrial reference): annual (markers) and interpolated (lines; as in b) ).

1165

### S16: Fast response to instant $4\times$ CO<sub>2</sub> and radiative forcing.

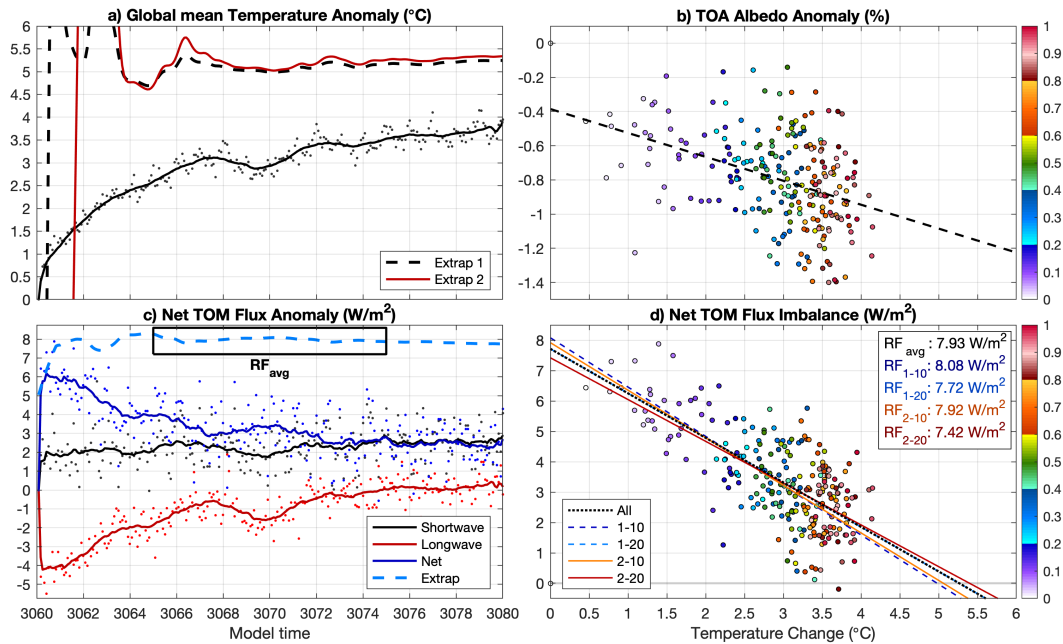

**Figure S16.** First 20 years of the response after an instant quadrupling of atmospheric CO<sub>2</sub>, starting from the equilibrated state of the pre-industrial reference. Model years 3060–3080 for both the reference and  $4\times$  CO<sub>2</sub> simulations are considered, of which the monthly mean output fields are compared 1 on 1. The respective differences are shown for monthly mean, globally average **a)** near surface air temperature, **b)** top of the atmosphere albedo, **c)** top of model net shortwave (black), longwave (red) and net (blue), and **d)** top of model net flux imbalance versus temperature. In addition to monthly means (dots in a), c); markers in b), d) coloured to normalised model time), smoothing averages are shown using a 2-year sliding window. A simple linear regression is added using a dashed black line in b), d) with the latter including the results of different time intervals and the corresponding estimated radiative forcing. The progression of the estimated temperature response using a linear regression starting from year 1 (black dashed) and year 2 (red) is shown as well in a), the same is done for the radiative forcing in c) (dashed blue; from year one only). The radiative forcing experienced by the model in this perturbation experiment is estimated by taking the average extrapolation using years 1–6 to 1–15 (i.e. 3066 to 3075) and shown as RF<sub>avg</sub> in d).



## Sea surface temperature proxies

### 42–38 Ma SST Proxies:

| Site           | p-lat | p-lon  | SST (°C) | $\sigma$ (°C) | Reference                 | Method                         |
|----------------|-------|--------|----------|---------------|---------------------------|--------------------------------|
| DSDP 277       | -55.5 | 178.1  | 28       | 4.7           | Hines et al. (2017)       | Mg/Ca                          |
| ODP 865        | 11.8  | -147.0 | 31       | 4.7           | Tripati et al. (2003)     | Mg/Ca                          |
| ODP 925        | 3.5   | -30.9  | 32       | 2.5           | Liu et al. (2009)         | TEX <sub>86</sub> <sup>H</sup> |
| ODP 929        | -1.8  | -31.2  | 30       | 2.5           | Liu et al. (2009)         | TEX <sub>86</sub> <sup>H</sup> |
| ODP 959        | -5.23 | -2.59  | 31.5     | 2.5           | Cramwinckel et al. (2018) | TEX <sub>86</sub> <sup>H</sup> |
| ODP 1052       | 24.2  | -61.6  | 32       | 1.2           | Okafor et al. (2009)      | Mg/Ca                          |
| ODP 1172       | -57.8 | 157.9  | 24       | 2.5           | Bijl et al. (2009)        | TEX <sub>86</sub> <sup>H</sup> |
| ACEX           | 82.5  | -5.7   | 10       | 2.7           | Evans et al. (2018)       | UK <sub>37</sub>               |
| Gulf Coast, US | 28.3  | -74.1  | 26       | 1.4           | Kobashi et al. (2004)     | $\delta^{18}\text{O}$          |
| Istra More 5   | 34.1  | 13.1   | 24       | 0.7           | Pearson et al. (2001)     | $\delta^{18}\text{O}$          |
| Java KW01      | 0.1   | 114.5  | 35       | 2.0           | Evans et al. (2018)       | $\Delta_{47}$                  |
|                |       |        | 36.3     | 1.9           | Evans et al. (2018)       | $\Delta_{47}$                  |
| New Zealand    | -49.3 | -169.7 | 26       | 4.7           | Hines et al. (2017)       | Mg/Ca                          |
| Seymour Is.    |       |        | 12.7     | 2.4           | Douglas et al. (2014)     | $\Delta_{47}$                  |
|                |       |        | 13.1     | 2.4           | Douglas et al. (2014)     | $\Delta_{47}$                  |
|                |       |        | 20.3     | 2.5           | Douglas et al. (2014)     | TEX <sub>86</sub> <sup>H</sup> |
| Tanzania       | -16.6 | 40.6   | 34       | 2.5           | Pearson et al. (2007)     | TEX <sub>86</sub> <sup>H</sup> |
| Tanz. Lindi    | -17.6 | 40.6   | 32       | 0.7           | Pearson et al. (2001)     | $\delta^{18}\text{O}$          |
| Hamp. Bas., UK | 43.6  | -2.9   | 23.2     | 2.6           | Evans et al. (2018)       | $\Delta_{47}$                  |

**Table S2.** Overview of 42–38 Ma SST proxies; site location, 38Ma reconstructed coordinates (p-lat,p-lon), SST estimate, calibration error, reference and method used.

### 38–34 Ma SST Proxies:

| Site           | p-lat | p-lon  | SST (°C) | $\sigma$ (°C) | Reference                  | Method                         |
|----------------|-------|--------|----------|---------------|----------------------------|--------------------------------|
| DSDP 277       | -55.5 | 178.1  | 26.6     | 2.5           | Liu et al. (2009)          | TEX <sub>86</sub> <sup>H</sup> |
|                |       |        | 25.6     | 4.7           | Liu et al. (2009)          | UK <sub>37</sub>               |
| DSDP 336       | 55.7  | -11.0  | 20       | 1.5           | Liu et al. (2009)          | UK <sub>37</sub>               |
| DSDP 511       | -58.8 | -30.4  | 19.5     | 2.5           | Liu et al. (2009)          | TEX <sub>86</sub> <sup>H</sup> |
|                |       |        | 19.6     | 1.5           | Liu et al. (2009)          | UK <sub>37</sub>               |
| ODP 689        | -68.3 | 14.0   | 12.3     | 4.6           | Petersen and Schrag (2015) | $\Delta_{47}$                  |
|                |       |        | 22.0     | 1.5           | Petersen and Schrag (2015) | $\Delta_{47}$                  |
| ODP 803        | -0.8  | -169.1 | 27.4     | 2.5           | Liu et al. (2009)          | TEX <sub>86</sub> <sup>H</sup> |
| ODP 913        | 66.2  | -2.4   | 18.3     | 1.5           | Liu et al. (2009)          | UK <sub>37</sub>               |
| ODP 925        | 3.5   | -30.9  | 30       | 2.5           | Liu et al. (2009)          | TEX <sub>86</sub> <sup>H</sup> |
| ODP 929        | -1.8  | -31.2  | 29       | 2.5           | Liu et al. (2009)          | TEX <sub>86</sub> <sup>H</sup> |
| ODP 959        | -5.23 | -2.59  | 28.5     | 2.5           | Cramwinckel et al. (2018)  | TEX <sub>86</sub> <sup>H</sup> |
| ODP 998        | 14.6  | -69.4  | 22.1     | 2.5           | Liu et al. (2009)          | TEX <sub>86</sub> <sup>H</sup> |
| ODP 1052       | 24.2  | -61.6  | 30       | 1.2           | Okafor et al. (2009)       | Mg/Ca                          |
| ODP 1090       | -51.9 | 157.9  | 22       | 2.5           | Bijl et al. (2009)         | UK <sub>37</sub>               |
| ODP 1172       | -57.8 | 157.9  | 22       | 2.5           | Bijl et al. (2009)         | TEX <sub>86</sub> <sup>H</sup> |
| Alabama, US    | 27.6  | -72.4  | 27       | 0.7           | Pearson et al. (2001)      | $\delta^{18}\text{O}$          |
| Browns C., Aus | -53.8 | 147.2  | 18.9     | 0.7           | Kamp et al. (1990)         | $\delta^{18}\text{O}$          |
| Gulf Coast, US | 28.3  | -74.1  | 22       | 1.4           | Kobashi et al. (2004)      | $\delta^{18}\text{O}$          |
| New Zealand    | -49.3 | -169.7 | 30.9     | 4.7           | Hines et al. (2017)        | Mg/Ca                          |
| Panama         | 0.9   | -72.9  | 32       | 1.4           | Tripati and Zachos (2002)  | $\delta^{18}\text{O}$          |
| Seymour Is.    | -68.5 | -62.5  | 12.2     | 2.4           | Douglas et al. (2014)      | $\Delta_{47}$                  |
|                |       |        | 13.0     | 3.0           | Douglas et al. (2014)      | $\Delta_{47}$                  |
|                |       |        | 16.0     | 2.5           | Douglas et al. (2014)      | TEX <sub>86</sub> <sup>H</sup> |
| St Stephens Q. | 27.2  | -72.2  | 32.5     | 2.2           | Wade et al. (2012)         | Mg/Ca                          |
|                |       |        | 34.9     | 4.7           | Wade et al. (2012)         | Mg/Ca                          |
|                |       |        | 30.5     | 2.5           | Wade et al. (2012)         | TEX <sub>86</sub> <sup>H</sup> |
| Tanzania       | -16.6 | 40.6   | 29.5     | 0.7           | Pearson et al. (2007)      | $\delta^{18}\text{O}$          |
|                |       |        | 33.0     | 2.5           | Pearson et al. (2007)      | TEX <sub>86</sub> <sup>H</sup> |
|                |       |        | 29.7     | 3.2           | Evans et al. (2018)        | $\Delta_{47}$                  |
| Tanz. Lindi    | -17.6 | 40.6   | 30.0     | 0.7           | Pearson et al. (2001)      | $\delta^{18}\text{O}$          |

**Table S3.** Overview of 38–34 Ma SST proxies; site location, 38Ma reconstructed coordinates (p-lat,p-lon), SST estimate, calibration error, reference and method used.

**Late Middle Eocene Land Temperature Proxies:**

| Site                   | T <sub>a</sub> (°C) | T <sub>x</sub> (°C) | T <sub>n</sub> (°C) | p-lat | p-lon  | Reference                     |
|------------------------|---------------------|---------------------|---------------------|-------|--------|-------------------------------|
| <b>North Atlantic:</b> |                     |                     |                     |       |        |                               |
| ODP 913 MBT            | 14.5                | 16.0                | 12.5                | 66.2  | -2.4   | Schouten et al. (2008)        |
| ODP 913 Pollen         | 13.3                | 16.2                | 11.8                | 66.2  | -2.4   | Eldrett et al. (2009)         |
| <b>North America:</b>  |                     |                     |                     |       |        |                               |
| Florissant CO          | 14.6                | 17.5                | 10.7                | 37.0  | -86.9  | Boyle et al. (2008)           |
| Comstock (OR)          | 21                  | 22.4                | 19.6                | 44.7  | -102.9 | Retallack et al. (2004)       |
| Copper B. (NV)         | 9.5                 | 10.5                | 8.5                 | 41.5  | -96.0  | Wolfe et al. (1998)           |
| Badger's N. (CA)       | 14.5                | 17.1                | 12.5                | 42.1  | -100.6 | Prothero (2008)               |
| Sevier (UT)            | 13.2                | 13.2                | 13.2                | 38.7  | -94.7  | Gregory-Wodzicki (1997)       |
| Gray B. (OR)           | 14.0                | 19.3                | 8.8                 | 45.0  | -100.6 | Smith et al. (1998)           |
| <b>South America:</b>  |                     |                     |                     |       |        |                               |
| Ñirihuau (Chile)       | 18.4                | 18.4                | 18.4                | -49.4 | -59.5  | Hinojosa and Villagrán (2005) |
| <b>Europe:</b>         |                     |                     |                     |       |        |                               |
| Stare Sedlo            | 23.9                | 29                  | 21.3                | 43.7  | 9.3    | Uhl et al. (2007)             |
| Weißer Elster          | 22.6                | 24                  | 18.7                | 44.9  | 8.3    | Uhl et al. (2007)             |
| <b>China:</b>          |                     |                     |                     |       |        |                               |
| Dalianhe               | 16.5                | 16.5                | 16.5                | 54.2  | 129.1  | Quan et al. (2012)            |
| Huanghua               | 18.1                | 18.3                | 17.9                | 52.7  | 129.4  | Quan et al. (2012)            |
| Jushu                  | 15.9                | 16.1                | 15.6                | 52.4  | 126.5  | Quan et al. (2012)            |
| Hunchun                | 17.5                | 18.4                | 16.5                | 50.8  | 130.9  | Quan et al. (2012)            |
| Huadian                | 17.0                | 18.4                | 15.6                | 50.8  | 126.4  | Quan et al. (2012)            |
| Jijuntun               | 16.8                | 17                  | 16.5                | 49.6  | 123.3  | Quan et al. (2012)            |
| Xilutan                | 17.0                | 18.4                | 15.6                | 49.6  | 123.3  | Quan et al. (2012)            |
| Kongdian               | 17.5                | 18.4                | 16.5                | 47.4  | 118.7  | Quan et al. (2012)            |
| Shahejie               | 17.1                | 18.4                | 15.7                | 45.6  | 116.3  | Quan et al. (2012)            |
| Sanduo                 | 17.1                | 18.4                | 15.7                | 40.7  | 118.4  | Quan et al. (2012)            |
| Dingyuan               | 15.5                | 16.1                | 14.8                | 39.6  | 116.1  | Quan et al. (2012)            |
| Shuangta               | 16.1                | 16.4                | 15.7                | 38.8  | 117.9  | Quan et al. (2012)            |
| Qingjiang              | 16.5                | 16.5                | 16.5                | 35.5  | 115.5  | Quan et al. (2012)            |
| Wenzhou                | 17.6                | 18.4                | 16.8                | 34.6  | 121.8  | Quan et al. (2012)            |
| Tantou                 | 17.1                | 18.4                | 15.7                | 40.7  | 110.7  | Quan et al. (2012)            |

**Table S4.** Overview of late middle Eocene terrestrial temperature proxies; site location, mean annual temperature, highest annual temperature, lowest annual temperature and 38Ma reconstructed coordinates.

| Site               | T <sub>a</sub> (°C) | T <sub>x</sub> (°C) | T <sub>n</sub> (°C) | p-lat | p-lon | Reference                    |
|--------------------|---------------------|---------------------|---------------------|-------|-------|------------------------------|
| Unnamed Unit 1     | 15.9                | 18.4                | 13.3                | 45.6  | 105.8 | Quan et al. (2012)           |
| Unnamed Unit 2     | 13.7                | 16.1                | 11.3                | 42.5  | 101.8 | Quan et al. (2012)           |
| Honggou            | 17.2                | 21.1                | 13.3                | 42.6  | 99.9  | Quan et al. (2012)           |
| Relu               | 14.1                | 16.4                | 11.7                | 36.3  | 95.1  | Quan et al. (2012)           |
| Huoshagou          | 16.4                | 21.7                | 11.0                | 45.4  | 93.7  | Quan et al. (2012)           |
| Lulehe             | 17.1                | 18.4                | 15.7                | 41.2  | 86.0  | Quan et al. (2012)           |
| Lulehe             | 17.1                | 18.4                | 15.7                | 37.0  | 88.1  | Quan et al. (2012)           |
| Totohe             | 14.9                | 16.5                | 13.3                | 34.6  | 87.3  | Quan et al. (2012)           |
| Wulagen            | 18.2                | 20.8                | 15.6                | 39.3  | 74.4  | Quan et al. (2012)           |
| Shenhu             | 16.6                | 21.7                | 11.5                | 30.0  | 113.3 | Quan et al. (2012)           |
| Liushagang         | 17.6                | 23.9                | 11.3                | 28.1  | 109.7 | Quan et al. (2012)           |
| Changchang         | 18.9                | 20.8                | 17                  | 26.8  | 110.6 | Quan et al. (2012)           |
| <b>Australia:</b>  |                     |                     |                     |       |       |                              |
| Anglesea           | 16.2                | 19.3                | 13.9                | -53.4 | 148.2 | Greenwood et al. (2004)      |
| Hasties            | 16.2                | 16.2                | 16.2                | -55.3 | 153.8 | Greenwood and Wing<br>(1995) |
| West Dale          | 16.1                | 17.9                | 14.2                | -49.1 | 111.4 | Greenwood et al. (2004)      |
| <b>Antarctica:</b> |                     |                     |                     |       |       |                              |
| McMurdo            | 13.0                | 13.0                | 13.0                | -72.1 | 158.2 | Passchier et al. (2013)      |
| SA Islands AP      | 12.0                | 15.0                | 10.5                | -67.5 | -63.5 | Passchier et al. (2013)      |

Table S4. Continued.

### Late Eocene Land Temperature Proxies:

| Site                   | T <sub>a</sub> (°C) | T <sub>x</sub> (°C) | T <sub>n</sub> (°C) | p-lat | p-lon  | Reference               |
|------------------------|---------------------|---------------------|---------------------|-------|--------|-------------------------|
| <b>North Atlantic:</b> |                     |                     |                     |       |        |                         |
| ODP 913 MBT            | 14.0                | 15.9                | 7.9                 | 66.2  | -2.4   | Schouten et al. (2008)  |
| ODP 913 Pollen         | 13.4                | 16.2                | 11.8                | 66.2  | -2.4   | Eldrett et al. (2009)   |
| <b>North America:</b>  |                     |                     |                     |       |        |                         |
| Florissant CO          | 14.6                | 17.5                | 10.7                | 37.0  | -86.9  | Boyle et al. (2008)     |
| Comstock (OR)          | 21                  | 22.4                | 19.6                | 44.7  | -102.9 | Retallack et al. (2004) |
| Copper B. (NV)         | 9.5                 | 10.5                | 8.5                 | 41.5  | -96.0  | Wolfe et al. (1998)     |
| Badger's N. (CA)       | 14.5                | 17.1                | 12.5                | 42.1  | -100.6 | Prothero (2008)         |
| Sevier (UT)            | 13.2                | 13.2                | 13.2                | 38.7  | -94.7  | Gregory-Wodzicki (1997) |
| Gray B. (OR)           | 14.0                | 19.3                | 8.8                 | 45.0  | -100.6 | Smith et al. (1998)     |

Table S5. Overview of late Eocene terrestrial temperature proxies; site location, mean annual temperature, highest annual temperature, lowest annual temperature and 38Ma reconstructed coordinates.

| Site                  | T <sub>a</sub> (°C) | T <sub>x</sub> (°C) | T <sub>n</sub> (°C) | p-lat | p-lon | Reference                     |
|-----------------------|---------------------|---------------------|---------------------|-------|-------|-------------------------------|
| <b>South America:</b> |                     |                     |                     |       |       |                               |
| Ñirihuau (Chile)      | 18.4                | 18.4                | 18.4                | -49.4 | -59.5 | Hinojosa and Villagrán (2005) |
| <b>Europe:</b>        |                     |                     |                     |       |       |                               |
| Stare Sedlo           | 23.9                | 29                  | 21.3                | 43.7  | 9.3   | Uhl et al. (2007)             |
| Weißer Elster         | 22.6                | 24                  | 18.7                | 44.9  | 8.3   | Uhl et al. (2007)             |
| <b>China:</b>         |                     |                     |                     |       |       |                               |
| Hunchun               | 18.2                | 18.4                | 17.9                | 50.8  | 130.9 | Quan et al. (2012)            |
| Gengjiajie            | 18.2                | 18.4                | 17.9                | 49.6  | 123.3 | Quan et al. (2012)            |
| Shahejie              | 17.5                | 18.4                | 16.5                | 47.4  | 118.7 | Quan et al. (2012)            |
| Sanduo                | 18.2                | 20.8                | 15.6                | 40.7  | 118.4 | Quan et al. (2012)            |
| Dingyuan              | 13.9                | 16.1                | 11.6                | 39.6  | 116.1 | Quan et al. (2012)            |
| Linjiang              | 18.0                | 19.4                | 16.5                | 35.5  | 115.5 | Quan et al. (2012)            |
| Pinghu                | 17.0                | 18.4                | 15.6                | 34.6  | 121.8 | Quan et al. (2012)            |
| Unnamed Unit 2        | 14.1                | 16.5                | 11.6                | 42.5  | 101.8 | Quan et al. (2012)            |
| Honggou               | 17.2                | 21.1                | 13.3                | 42.6  | 99.9  | Quan et al. (2012)            |
| Relu                  | 15.2                | 15.6                | 14.8                | 36.3  | 95.1  | Quan et al. (2012)            |
| Huoshagou             | 15.6                | 21.7                | 9.4                 | 45.4  | 93.7  | Quan et al. (2012)            |
| Xiaganchaigou         | 17.1                | 18.4                | 15.7                | 41.2  | 86.0  | Quan et al. (2012)            |
| Wanbaogou             | 19.2                | 21.9                | 16.5                | 37.0  | 88.1  | Quan et al. (2012)            |
| Bashibulake           | 17.1                | 20.8                | 13.3                | 39.3  | 74.4  | Quan et al. (2012)            |
| Xiaokuzibai           | 18.8                | 20.8                | 16.8                | 43.8  | 78.7  | Quan et al. (2012)            |
| Youganwo              | 17.2                | 18.6                | 15.7                | 28.6  | 110.8 | Quan et al. (2012)            |
| Liushagang            | 16.1                | 20.8                | 11.3                | 28.1  | 109.7 | Quan et al. (2012)            |
| Yongning Gr.          | 17.8                | 18.4                | 17.2                | 28.8  | 106.8 | Quan et al. (2012)            |
| Nadu                  | 15.9                | 16.1                | 15.7                | 30.5  | 106.0 | Quan et al. (2012)            |
| Dagzhuka              | 17.5                | 18.4                | 16.5                | 29.9  | 87.6  | Quan et al. (2012)            |
| <b>Antarctica:</b>    |                     |                     |                     |       |       |                               |
| McMurdo               | 13.0                | 13.0                | 13.0                | -72.1 | 158.2 | Passchier et al. (2013)       |
| King George           | 13.4                | 15.0                | 11.7                | -66.3 | -64.5 | Passchier et al. (2013)       |
| ODP 1166              | 12.0                | 12.0                | 12.0                | -64.8 | 87.3  | Passchier et al. (2013)       |

Table S5. Continued.
